# Supplementary material
Source: Springer Nature journal article supplement (https://www.springermedizin.de/resource/supplementary/12961_2014_339_MOESM6_ESM.pdf/9571076)

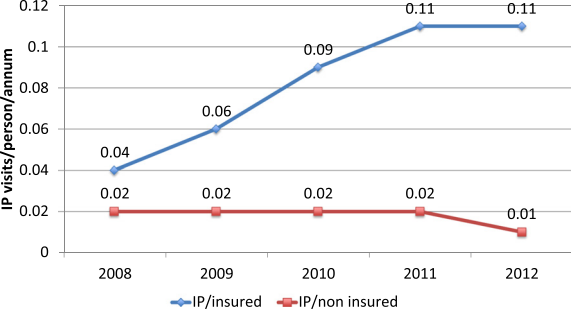

Supplement: MOESM6 [file 9571076]
